# Supplementary material for: ‘You can change your life through sports’—physical activity interventions to improve the health and well-being of adults experiencing homelessness: a mixed-methods systematic review
Source: PubMed Central journal article supplement — Br J Sports Med. 2024 Feb 27;58(8):444–58. doi: 10.1136/bjsports-2023-107562 (PMC11041619; doi:10.1136/bjsports-2023-107562), 2024-02-27
Supplement: bjsports-2023-107562supp002.pdf [file bjsports-2023-107562supp002.pdf]

## Supplementary File 2: Quality assessments of qualitative and quantitative studies using JBI critical appraisal checklists

## Supplementary Table 2a: Quality assessment of qualitative studies, using JBI critical appraisal checklists

|                                                                                                                                                     | Qualitative      |                            |                            |                             |                  |                  |                            |                  |                            |                            |                            |
|-----------------------------------------------------------------------------------------------------------------------------------------------------|------------------|----------------------------|----------------------------|-----------------------------|------------------|------------------|----------------------------|------------------|----------------------------|----------------------------|----------------------------|
|                                                                                                                                                     | Dawes 2019       | Grabbe 2013                | Grimes 2020                | Knestaut 2010               | Malden 2019      | Magee 2013       | Parry 2021a                | Parry 2021b      | Sherry 2010                | Sherry 2012                | Welty 2013                 |
| Q1: Is there congruity between the stated philosophical perspective and the research methodology?                                                   | Yes              | Yes                        | Yes                        | No                          | Yes              | Yes              | Yes                        | Yes              | Unclear                    | Yes                        | Yes                        |
| Q2: Is there congruity between the research methodology and the research question or objectives?                                                    | Yes              | Yes                        | Yes                        | No                          | Yes              | Yes              | Yes                        | Yes              | Unclear                    | Yes                        | Yes                        |
| Q3: Is there congruity between the research methodology and the methods used to collect data?                                                       | Yes              | Yes                        | Yes                        | No                          | Yes              | Yes              | Yes                        | Yes              | Yes                        | Yes                        | Yes                        |
| Q4: Is there congruity between the research methodology and the representation and analysis of data?                                                | Yes              | No                         | Yes                        | No                          | Yes              | Yes              | Yes                        | Yes              | Yes                        | Yes                        | Yes                        |
| Q5: Is there congruity between the research methodology and the interpretation of results?                                                          | Yes              | No                         | Yes                        | Unclear                     | Yes              | Yes              | Yes                        | Yes              | Yes                        | Yes                        | Yes                        |
| Q6: Is there a statement locating the researcher culturally or theoretically?                                                                       | Yes              | No                         | No                         | Yes                         | Yes              | Yes              | No                         | Yes              | No                         | No                         | No                         |
| Q7: Is the influence of the researcher on the research, and vice-versa, addressed?                                                                  | No               | No                         | No                         | No                          | Yes              | Yes              | No                         | Yes              | No                         | No                         | Unclear                    |
| Q8: Are participants, and their voices, adequately represented?                                                                                     | Yes              | Yes                        | Yes                        | No                          | Yes              | Yes              | Yes                        | Yes              | Yes                        | Yes                        | Yes                        |
| Q9: Is the research ethical according to current criteria or, for recent studies, and is there evidence of ethical approval by an appropriate body? | Yes              | Yes                        | Yes                        | No                          | Yes              | Yes              | Yes                        | Unclear          | Unclear                    | No                         | No                         |
| Q10: Do the conclusions drawn in the research report flow from the analysis, or interpretation, of the data?                                        | Yes              | Yes                        | Yes                        | Unclear                     | Yes              | Yes              | Yes                        | Yes              | Yes                        | Yes                        | Yes                        |
| Dependability rating (Based on number of "yes" across Q2, 3, 4, 6 and 7)[1]                                                                         | 4/5<br>Unchanged | 2/5<br>Downgrade one level | 3/5<br>Downgrade one level | 1/5<br>Downgrade two levels | 5/5<br>Unchanged | 5/5<br>Unchanged | 3/5<br>Downgrade one level | 5/5<br>Unchanged | 2/5<br>Downgrade one level | 3/5<br>Downgrade one level | 3/5<br>Downgrade one level |
| Credibility rating (Based on review of findings)[1]                                                                                                 | Unequivocal      | Equivocal                  | Unequivocal                | Equivocal                   | Unequivocal      | Unequivocal      | Unequivocal                | Unequivocal      | Equivocal                  | Equivocal                  | Unequivocal                |
| High, mod, low, v low                                                                                                                               | High             | Low                        | Moderate                   | Very Low                    | High             | High             | Moderate                   | High             | Low                        | Low                        | Moderate                   |

1. Munn, Z., et al., *Establishing confidence in the output of qualitative research synthesis: the ConQual approach*. BMC Medical Research Methodology, 2014. **14**(1): p. 108.

## Supplementary File 2: Quality assessments of qualitative and quantitative studies using JBI critical appraisal checklists

## Supplementary Table 2b: Quality assessment of quantitative studies, using JBI critical appraisal checklists

|                                                                                                                                           | RCT                    | Quasi-experimental    |                        |                        |                        |                       | Analytical Cross-sectional |
|-------------------------------------------------------------------------------------------------------------------------------------------|------------------------|-----------------------|------------------------|------------------------|------------------------|-----------------------|----------------------------|
|                                                                                                                                           | Kendzor 2017           | Shors 2014            | Helge 2014             | Randers 2010           | Randers 2012           | Norton 2020           | Randers 2018               |
| Was true randomization used for assignment of participants to treatment groups?                                                           | Yes                    |                       |                        |                        |                        |                       |                            |
| Was allocation to treatment groups concealed?                                                                                             | Unclear                |                       |                        |                        |                        |                       |                            |
| Were treatment groups similar at the baseline?                                                                                            | Yes                    |                       |                        |                        |                        |                       |                            |
| Were participants blind to treatment assignment?                                                                                          | No                     |                       |                        |                        |                        |                       |                            |
| Were those delivering treatment blind to treatment assignment?                                                                            | No                     |                       |                        |                        |                        |                       |                            |
| Were outcomes assessors blind to treatment assignment?                                                                                    | Unclear                |                       |                        |                        |                        |                       |                            |
| Were treatment groups treated identically other than the intervention of interest?                                                        | No                     |                       |                        |                        |                        |                       |                            |
| Was follow up complete and if not, were differences between groups in terms of their follow up adequately described and analyzed?         | Yes                    | Unclear               | No                     | No                     | No                     | No                    |                            |
| Were participants analyzed in the groups to which they were randomized?                                                                   | Yes                    |                       |                        |                        |                        |                       |                            |
| Were outcomes measured in the same way for treatment groups?                                                                              | Yes                    |                       |                        |                        |                        |                       |                            |
| Were outcomes measured in a reliable way?                                                                                                 | Yes                    | Unclear               | Yes                    | Yes                    | Yes                    | Yes                   | Yes                        |
| Was appropriate statistical analysis used?                                                                                                | Yes                    | Unclear               | Yes                    | Yes                    | Yes                    | Yes                   | Yes                        |
| Was the trial design appropriate, and any deviations from the standard RCT design accounted for in the conduct and analysis of the trial? | Yes                    |                       |                        |                        |                        |                       |                            |
| Is it clear in the study what is the 'cause' and what is the 'effect' (i.e. there is no confusion about which variable comes first)?      |                        | Yes                   | Yes                    | Yes                    | Yes                    | Yes                   |                            |
| Were the participants included in any comparisons similar?                                                                                |                        | Unclear               | Yes                    | Yes                    | Yes                    | Yes                   |                            |
| Were the participants included in any comparisons receiving similar treatment/care, other than the exposure or intervention of interest?  |                        | Yes                   | Yes                    | Yes                    | Yes                    | No                    |                            |
| Was there a control group?                                                                                                                |                        | Yes                   | Yes                    | Yes                    | Yes                    | Yes                   |                            |
| Were there multiple measurements of the outcome both pre and post the intervention/exposure?                                              |                        | No                    | No                     | No                     | No                     | No                    |                            |
| Were the outcomes of participants included in any comparisons measured in the same way?                                                   |                        | Unclear               | Yes                    | Yes                    | Yes                    | Yes                   |                            |
| Were the criteria for inclusion in the sample clearly defined?                                                                            |                        |                       |                        |                        |                        |                       | Unclear                    |
| Were the study subjects and the setting described in detail?                                                                              |                        |                       |                        |                        |                        |                       | Yes                        |
| Was the exposure measured in a valid and reliable way?                                                                                    |                        |                       |                        |                        |                        |                       | Yes                        |
| Were objective, standard criteria used for measurement of the condition?                                                                  |                        |                       |                        |                        |                        |                       | Yes                        |
| Were confounding factors identified?                                                                                                      |                        |                       |                        |                        |                        |                       | No                         |
| Were strategies to deal with confounding factors stated?                                                                                  |                        |                       |                        |                        |                        |                       | No                         |
| Quantitative quality rating: [2]<br>(High: >75%/ Mod: 50-75%/ Low: 25-50%/ v low: <25%)                                                   | 8/13 =<br>61.5%<br>Mod | 3/9 =<br>33.3%<br>Low | 7/9 =<br>77.7%<br>High | 7/9 =<br>77.7%<br>High | 7/9 =<br>77.7%<br>High | 6/9 =<br>66.7%<br>Mod | 5/8 =<br>62.5%<br>Mod      |

2. Munn, Zachary; Barker, Timothy Hugh; Moola, Sandeep; Tufanaru, Catalin; Stern, Cindy; McArthur, Alexa; Stephenson, Matthew; Aromataris, Edoardo. Methodological quality of case series studies: an introduction to the JBI critical appraisal tool. *JBI Evidence Synthesis* 18(10):p 2127-2133, October 2020. | DOI: 10.11124/JBISIR-D-19-00099
