# Supplementary material for: ‘You can change your life through sports’—physical activity interventions to improve the health and well-being of adults experiencing homelessness: a mixed-methods systematic review
Source: PubMed Central journal article supplement — Br J Sports Med. 2024 Feb 27;58(8):444–58. doi: 10.1136/bjsports-2023-107562 (PMC11041619; doi:10.1136/bjsports-2023-107562), 2024-02-27
Supplement: bjsports-2023-107562supp003.pdf [file bjsports-2023-107562supp003.pdf]

## Supplementary file 3: Summary of qualitative thematic analysis

| Overarching theme                                                   | Theme                                                                                                                                     | Sub theme                                                                                                   | Level of confidence in evidence for intervention type                                                                                                                                                                                                                                                            |
|---------------------------------------------------------------------|-------------------------------------------------------------------------------------------------------------------------------------------|-------------------------------------------------------------------------------------------------------------|------------------------------------------------------------------------------------------------------------------------------------------------------------------------------------------------------------------------------------------------------------------------------------------------------------------|
| Physical health benefits of physical activity interventions for PEH | Belief that physical activity improves the body shape of people experiencing homelessness                                                 | Improved body shape and self-image                                                                          | <b>High</b> (Running groups[1], Indoor group instructor-led exercise[2])                                                                                                                                                                                                                                         |
|                                                                     |                                                                                                                                           | Weight loss                                                                                                 | <b>High</b> (Running groups[1])<br><b>Low</b> (Soccer- group training[3])                                                                                                                                                                                                                                        |
|                                                                     | Belief that physical activity improves physical condition of people experiencing homelessness                                             | Perception of improved fitness levels                                                                       | <b>High</b> (Running groups[1], Soccer- group training and Tournament participation[4], Indoor group instructor-led exercise[2])<br><b>Moderate</b> (Earn-a-bike[5])<br><b>Low</b> (Soccer- group training[3])<br><b>Very Low</b> (Group instructor-led dance[6])                                                |
|                                                                     |                                                                                                                                           | Physical skill development                                                                                  | <b>Moderate</b> (Group Outdoor adventure[7])<br><b>Low</b> (Soccer- group training[3])<br><b>Very Low</b> (Group instructor-led dance[6])                                                                                                                                                                        |
|                                                                     | Belief that participating in physical activity interventions makes people experiencing homelessness more active in general                | Participating in the physical activity intervention increased physical activity in everyday life            | <b>High</b> (Running groups[1], Indoor group instructor-led exercise[2])<br><b>Moderate</b> (Earn-a-bike[5])<br><b>Low</b> (Soccer-group training[3])                                                                                                                                                            |
|                                                                     |                                                                                                                                           | Broader aspects of the intervention (clothes, equipment, skill) facilitated physical activity participation | <b>High</b> (Running groups[1])<br><b>Very Low</b> (Group instructor-led dance[6])                                                                                                                                                                                                                               |
| Mental health benefits of physical activity interventions for PEH   | Belief that physical activity facilitated people experiencing homelessness in self-develop and their ability to cope with life situations | Confidence, empowerment and self-esteem                                                                     | <b>High</b> (Group running[1], Soccer- group training and tournament participation[4], Indoor group instructor-led exercise[2])<br><b>Moderate</b> (Earn-a-bike[5], Group outdoor adventure[7])<br><b>Low</b> (Gardening group[8], Soccer- group training[3])<br><b>Very low</b> (Group instructor-led dance[6]) |
|                                                                     |                                                                                                                                           | Resilience, coping and hope                                                                                 | <b>High</b> (Group running[1], Group outdoor adventure[9])<br><b>Moderate</b> (Group outdoor adventure[7])<br><b>Low</b> (Gardening group[8], Soccer- group training[3])<br><b>Very low</b> (Group instructor-led dance[6])                                                                                      |

## Supplementary file 3: Summary of qualitative thematic analysis

|                                                                        |                                                                                                                       |                                                                   |                                                                                                                                                                                                                                                                                                                                                               |
|------------------------------------------------------------------------|-----------------------------------------------------------------------------------------------------------------------|-------------------------------------------------------------------|---------------------------------------------------------------------------------------------------------------------------------------------------------------------------------------------------------------------------------------------------------------------------------------------------------------------------------------------------------------|
|                                                                        | Belief that physical activity resulted in people experiencing homelessness feeling mentally better                    | Independence, focus, personal development and relationships       | <p><b>High</b> (Group running[1], Soccer- group training and tournament participation[4])</p> <p><b>Moderate</b> (Group outdoor adventure[7], Earn-a-bike[5])</p> <p><b>Low</b> (Gardening group[8], Soccer- group training and tournament participation [10])</p> <p><b>Very low</b> (Group instructor-led dance[6])</p>                                     |
|                                                                        |                                                                                                                       | Positive effect on stress and anxiety                             | <p><b>High</b> (Group running[1], Indoor group instructor-led exercise[2], Group outdoor adventure[9])</p> <p><b>Moderate</b> (Soccer- tournament participation[11], Earn-a-bike[5])</p> <p><b>Low</b> (Gardening group[8], Soccer- group training and tournament participation [10])</p> <p><b>Very low</b> (Group instructor-led dance[6])</p>              |
| The impact of physical activity interventions on the wider life of PEH | Belief that the benefits of physical activity interventions carry into wider life of people experiencing homelessness | Development of life and interpersonal skills                      | <p><b>High</b> (Group running[1], Group outdoor adventure[9])</p> <p><b>Moderate</b> (Soccer- tournament participation[11], Earn-a-bike[5], Group outdoor adventure[7])</p> <p><b>Low</b> (Soccer- group training and tournament participation[10], soccer- group training[3], Gardening group[8])</p> <p><b>Very low</b> (Group instructor-led dance[6])</p> |
|                                                                        |                                                                                                                       | Improved social connection and building relationships with others | <p><b>High</b> (Group running[1], Group outdoor adventure[9])</p> <p><b>Moderate</b> (Soccer- tournament participation[11], Earn-a-bike[5], Group outdoor adventure[7])</p> <p><b>Low</b> (Soccer- group training and tournament participation[10], soccer- group training[3], Gardening group[8])</p>                                                        |
|                                                                        |                                                                                                                       | Physical activity as a catalyst for positive healthy life change  | <p><b>High</b> (Group outdoor adventure[9])</p> <p><b>Moderate</b> (Soccer- tournament participation[11])</p> <p><b>Low</b> (Soccer- group training and tournament participation[10], Gardening group[8])</p>                                                                                                                                                 |
|                                                                        |                                                                                                                       | Practical and functional benefits developed from participation    | <p><b>Moderate</b> (Earn-a-bike[5])</p> <p><b>Low</b> (Soccer- group training and tournament participation[10], soccer- group training[3])</p>                                                                                                                                                                                                                |

## Supplementary file 3: Summary of qualitative thematic analysis

|  |                                                                                                                                          |                                                                                  |                                                                                                                                                                                                                          |
|--|------------------------------------------------------------------------------------------------------------------------------------------|----------------------------------------------------------------------------------|--------------------------------------------------------------------------------------------------------------------------------------------------------------------------------------------------------------------------|
|  | Perception of challenges related to physical activity participation whilst homeless                                                      | Homelessness presents specific barriers to PA participation                      | <b>High</b> (Group running[1])<br><b>Moderate</b> (Earn-a-bike[5])<br><b>Low</b> (Soccer- group training and tournament participation[10], soccer- group training[3])<br><b>Very low</b> (Group instructor-led dance[6]) |
|  |                                                                                                                                          | Participating in soccer tournaments can be stressful                             | <b>High</b> (Soccer- group training and tournament participation[4])<br><b>Moderate</b> (Soccer- tournament participation[11])                                                                                           |
|  |                                                                                                                                          | Perceived poor performance/ aptitude can negatively impact confidence and coping | <b>High</b> (Soccer- group training and tournament participation[4])<br><b>Moderate</b> (Soccer- tournament participation[11])<br><b>Very low</b> (Group instructor-led dance[6])                                        |
|  | Belief of physical activity positive impact on self-medication, prescribed medication and addiction for people experiencing homelessness | Reduction in need for prescription medication and self-medication                | <b>Moderate</b> (Earn-a-bike[4])                                                                                                                                                                                         |
|  |                                                                                                                                          | Reduced substance misuse                                                         | <b>High</b> (Soccer- group training and tournament participation[10])<br><b>Moderate</b> (Earn-a-bike[4])<br><b>Low</b> (soccer- group training[7])                                                                      |
|  |                                                                                                                                          | Diversion from temptation of addiction                                           | <b>Low</b> (soccer- group training[7])                                                                                                                                                                                   |

1. Dawes, J., C. Sanders, and R. Allen, "A Mile in Her Shoes": A qualitative exploration of the perceived benefits of volunteer led running groups for homeless women. *Health & social care in the community*, 2019. **27**(5): p. 1232-1240.
2. Malden, S., et al., A theory based evaluation of an intervention to promote positive health behaviors and reduce social isolation in people experiencing homelessness. *Journal of social distress and the homeless*, 2019. **28**(2): p. 158-168.
3. Sherry, E. and V. Strybosch, A kick in the right direction: longitudinal outcomes of the Australian Community Street Soccer Program. *Soccer & Society*, 2012. **13**(4): p. 495-509.
4. Magee, J. and R. Jeanes, *Football's coming home: A critical evaluation of the Homeless World Cup as an intervention to combat social exclusion*. *International Review for the Sociology of Sport*, 2011. **48**(1): p. 3-19.
5. Grimes, A. and M. Smirnova, *Perspectives on an earn-a-bike intervention on transportation, health and self- esteem among men experiencing homelessness*. *Journal of Transport & Health*, 2020. **18**: p. 11.
6. Knestaur, M., M.A. Devine, and B. Verlezza, 'It Gives Me Purpose': The Use of Dance with People Experiencing Homelessness. *Therapeutic Recreation Journal*, 2010. **44**(4): p. 289-301.

## Supplementary file 3: Summary of qualitative thematic analysis

7. Parry, B.J., et al., *Improving outcomes in young people experiencing homelessness with My Strengths Training for Life™ (MST4Life™): A qualitative realist evaluation*. Children and Youth Services Review, 2021. **121**: p. 105793.
8. Grabbe, L., J. Ball, and A. Goldstein, *Gardening for the mental well-being of homeless women*. Journal of holistic nursing : official journal of the American Holistic Nurses' Association, 2013. **31**(4): p. 258-66.
9. Parry, B.J., et al., *Promoting Personal Growth in Young People Experiencing Homelessness Through an Outdoors-Based Program*. 2021, 2021. **16**(5): p. 36.
10. Sherry, E., *(Re)engaging marginalized groups through sport: The Homeless World Cup*. International Review for the Sociology of Sport, 2010. **45**(1): p. 59-71.
11. Peachey, J., et al., *Street Soccer USA Cup: Preliminary findings of a sport-for-homeless intervention*. The ICHPER-SD Journal of Research, 2013. **8**: p. 3-11.
