# Supplementary material for: ‘You can change your life through sports’—physical activity interventions to improve the health and well-being of adults experiencing homelessness: a mixed-methods systematic review
Source: PubMed Central journal article supplement — Br J Sports Med. 2024 Feb 27;58(8):444–58. doi: 10.1136/bjsports-2023-107562 (PMC11041619; doi:10.1136/bjsports-2023-107562), 2024-02-27
Supplement: bjsports-2023-107562supp004.pdf [file bjsports-2023-107562supp004.pdf]

## Supplementary file 4: Physical activity interventions for people experiencing homelessness

| Broad intervention theme | Physical activity intervention    | Study                                   | Number of participants receiving intervention and providing study data | Setting                                                                                                                        | Frequency                                                                                                                                                                                                                              | Intensity                                                                                                                                                                                                            | Time                                                                                                                                                                              | Type                                                                                                                                                 | Group/individual | Presence of other components |
|--------------------------|-----------------------------------|-----------------------------------------|------------------------------------------------------------------------|--------------------------------------------------------------------------------------------------------------------------------|----------------------------------------------------------------------------------------------------------------------------------------------------------------------------------------------------------------------------------------|----------------------------------------------------------------------------------------------------------------------------------------------------------------------------------------------------------------------|-----------------------------------------------------------------------------------------------------------------------------------------------------------------------------------|------------------------------------------------------------------------------------------------------------------------------------------------------|------------------|------------------------------|
| Soccer                   | Soccer (group training)           | Randers 2010                            | 15                                                                     | Outdoors<br>four-a-side<br>asphalt<br>soccer pitch<br>(22× 16m)                                                                | Two<br>sessions                                                                                                                                                                                                                        | NS                                                                                                                                                                                                                   | 1 hour                                                                                                                                                                            | <u>Soccer</u> : 4 vs 4<br>Soccer games                                                                                                               | Group            | NS                           |
|                          |                                   | Helge et al, 2014 & Randers et al, 2012 | 18                                                                     | <u>Soccer</u> :<br>Outdoors<br>four-a-side<br>asphalt pitch<br>(22× 16m)<br><br><u>Supervised training</u> :<br>fitness centre | <u>Soccer</u> :<br>mean of 2.2<br>± 0.7<br>sessions per<br>week<br><br><u>Supervised training</u> :<br>mean of 0.5<br>± 0.2<br>sessions per<br>week,<br>including 5 x<br>strength<br>exercises<br>(one set of<br>10–12<br>repetitions) | <u>Soccer</u> :<br>Verbally<br>encouraged by<br>coaches<br><br><u>Supervised training</u> : low<br>intensity warm<br>up, moderate<br>intensity<br>strength<br>training,<br>exercises at ><br>15Repetition<br>Maximum | <u>Soccer</u> :<br>10min warm<br>up, duration<br>of soccer<br>training<br>unclear<br><br><u>Supervised training</u> :<br>15mins warm<br>up + strength<br>training time<br>unclear | <u>Soccer</u> : 4 vs 4<br>Soccer games<br><br><u>Supervised training</u> :<br>cardiovascular<br>warm up,<br>strength-based<br>resistance<br>training | Group            | NS                           |
|                          |                                   | Sherry & Strybosch, 2012                | 144                                                                    | NS                                                                                                                             | Weekly                                                                                                                                                                                                                                 | NS                                                                                                                                                                                                                   | 14min games<br>with 1min<br>half time<br>break                                                                                                                                    | Soccer                                                                                                                                               | Group            | Links to<br>service          |
|                          | Soccer (Tournament participation) | Randers et al, 2018                     | 15                                                                     | Outdoors<br>four-a-side<br>artificial turf<br>street soccer                                                                    | NS                                                                                                                                                                                                                                     | Majority of<br>play at 70-100<br>%HR <sub>peak</sub>                                                                                                                                                                 | 4 day<br>tournament.<br>Mean playing<br>time per                                                                                                                                  | Soccer                                                                                                                                               | Group            | International<br>travel      |

|                        |                                                      |                           |    |                                         |    |                                         |                                |                                                                                                    |       |                                                                                                                           |
|------------------------|------------------------------------------------------|---------------------------|----|-----------------------------------------|----|-----------------------------------------|--------------------------------|----------------------------------------------------------------------------------------------------|-------|---------------------------------------------------------------------------------------------------------------------------|
|                        |                                                      |                           |    | pitch (22×16m with 4m wide goals)       |    | Rate Perceived Exertion (x/10) 4.8± 2.5 | game: 11.1 ± 2.6min            |                                                                                                    |       |                                                                                                                           |
|                        |                                                      | Welty Peachey et al, 2013 | 11 | NS                                      | NS | NS                                      | 4 day tournament               | Soccer                                                                                             | Group | Opening/closing ceremonies, awards                                                                                        |
|                        | Soccer (group training and Tournament participation) | Magee & Jeanes, 2013      | 6  | NS                                      | NS | NS                                      | 10 weeks training + tournament | Soccer                                                                                             | Group | Access to support services                                                                                                |
|                        |                                                      | Sherry, 2010              | 8  | NS                                      | NS | NS                                      | NS                             | Soccer                                                                                             | Group | Informal support, link to services                                                                                        |
| Group outdoor exercise | Group Outdoor Adventure                              | Norton et al, 2020        | 32 | Outdoors                                | NS | NS                                      | NS                             | Archery, geocaching, rock climbing, and hiking                                                     | Group | Debrief, reflection on experience, individual and therapy therapy, childcare, ABC-R therapy model during outdoor activity |
|                        |                                                      | Parry 2021a               | 30 | Countryside, 170km from usual residence | NS | NS                                      | 4 days                         | Team based activities: canoeing, hiking, high ropes course, and raft building                      | Group | Preceding phase of 10 x Positive Youth Development life skills workshops                                                  |
|                        |                                                      | Parry 2021b               | 54 | Outdoors                                | NS | NS                                      | 3 to 4 days                    | canoeing, raft building, a mountain hike, high and low ropes courses, mountain biking, and caving. | Group | Preceding phase of 10 x Positive Youth Development life skills workshops and Team-based,                                  |

|                                  |                                |                      |    |                                                                   |              |                                                                           |                                                                                                                              |                                                                                                                                                                                |                                                               |                                                                 |
|----------------------------------|--------------------------------|----------------------|----|-------------------------------------------------------------------|--------------|---------------------------------------------------------------------------|------------------------------------------------------------------------------------------------------------------------------|--------------------------------------------------------------------------------------------------------------------------------------------------------------------------------|---------------------------------------------------------------|-----------------------------------------------------------------|
|                                  |                                |                      |    |                                                                   |              |                                                                           |                                                                                                                              |                                                                                                                                                                                |                                                               | structured reflections                                          |
|                                  | Running groups                 | Dawes et al, 2019    | 11 | Local park                                                        | NS           | Participant self-selected                                                 | 1 hour/session                                                                                                               | Running                                                                                                                                                                        | Group                                                         | Running kit, healthy snack                                      |
|                                  | Gardening groups               | Grabbe et al, 2013   | 8  | Vegetable garden in rear parking lot of daytime shelter for women | 2 x per week | NS                                                                        | “staffed sessions” 2 hours, but women could engage in gardening at any time during daylight hours when the shelter was open. | Gardening, including: planting seeds, pulling weeds, watering, harvesting, washing produce,                                                                                    | Group, but possible to undertake as an individual, if desired | Food preparation, health, nutrition, and horticulture education |
| Group indoor multimodal exercise | Group instructor-led dance     | Knestaut et al, 2010 | 11 | Recreation room of homeless shelter                               | Weekly       | Gentle warm up, exercise to elevate heart rate and raise core temperature | 50 mins                                                                                                                      | Instructor-led group dance programme: stretching, cardiovascular exercise and dance genres including: hip hop, country-line dance, ballet, and creative movement/improvisation | Group                                                         | Informal debrief                                                |
|                                  | Group instructor-led, exercise | Malden et al, 2019   | 10 | Local leisure centre                                              | Weekly       | NS                                                                        | Approx. 1 hour                                                                                                               | instructor-led group fitness class: aerobic circuits and strength-based resistance training exercises to music                                                                 | Group                                                         | peer support workshop and lunch                                 |

|                                    |                                                                    |                         |    |                                                                                                       |                         |    |                                                                                                         |                                                                                                                                             |                                                                     |                                                    |
|------------------------------------|--------------------------------------------------------------------|-------------------------|----|-------------------------------------------------------------------------------------------------------|-------------------------|----|---------------------------------------------------------------------------------------------------------|---------------------------------------------------------------------------------------------------------------------------------------------|---------------------------------------------------------------------|----------------------------------------------------|
|                                    | Sitting/ walking meditation, aerobic-based dance exercise training | Shors et al, 2014       | 8  | NS                                                                                                    | 2x per week for 8 weeks | NS | 1 hour total: 20 mins Sitting meditation, 10 mins walking, 30mins aerobic-based dance exercise training | Sitting meditation, walking, aerobic-based dance exercise training                                                                          | Group                                                               | NS                                                 |
| Individual multimodal intervention | Pedometer with step count goals                                    | Kendzor et al, 2017     | 15 | Shelter for homeless adults                                                                           | NS                      | NS | 28 day period                                                                                           | Wear pedometer during waking hours and work towards 10,000 daily step goal                                                                  | Individual                                                          | Educational newsletter, fruit/ veg snacks,         |
|                                    | Earn-a-bike programme                                              | Grimes & Smirnova, 2020 | 16 | Partnership between pedestrian and bicycling advocacy organization and local homeless outreach agency | NS                      | NS | NS                                                                                                      | cycle safety training, including training on riding in heavy traffic and bicycle handling skills. Provision of bicycle and safety equipment | Unclear if training delivered in groups. Earning bicycle individual | Rules of the road and bicycle maintenance training |
