# Supplementary material for: ‘You can change your life through sports’—physical activity interventions to improve the health and well-being of adults experiencing homelessness: a mixed-methods systematic review
Source: PubMed Central journal article supplement — Br J Sports Med. 2024 Feb 27;58(8):444–58. doi: 10.1136/bjsports-2023-107562 (PMC11041619; doi:10.1136/bjsports-2023-107562), 2024-02-27
Supplement: bjsports-2023-107562supp005.pdf [file bjsports-2023-107562supp005.pdf]

## Supplementary File 5: Study populations within studies identified in systematic review

| Study                                   | Description of participants                                                                                                                                                                 | Number of Participants | Characteristics of participants who were homeless, does not include any participants who were staff     |                                                                                               |                      |                                   |                                                                                                                                           |                |    |       |
|-----------------------------------------|---------------------------------------------------------------------------------------------------------------------------------------------------------------------------------------------|------------------------|---------------------------------------------------------------------------------------------------------|-----------------------------------------------------------------------------------------------|----------------------|-----------------------------------|-------------------------------------------------------------------------------------------------------------------------------------------|----------------|----|-------|
|                                         |                                                                                                                                                                                             |                        | Age (years)                                                                                             | Educational achievement                                                                       | Number in employment | Ethnicity/ race                   | Physical/Mental health/ psychological trauma                                                                                              | Biological Sex |    |       |
|                                         |                                                                                                                                                                                             |                        |                                                                                                         |                                                                                               |                      |                                   |                                                                                                                                           | F              | M  | Other |
| Dawes et al, 2019                       | Adult women with lived experience of homelessness, who had attended running groups for a minimum of 4 weeks.                                                                                | 11                     | Range: 23-57<br>Mean (SD): NS                                                                           | NS                                                                                            | NS                   | NS                                | NS                                                                                                                                        | 11             | 0  |       |
| Grabbe et al, 2013                      | Adult women living in shelters or on the street.                                                                                                                                            | 8                      | Range: 20-59<br>Mean (SD): NS                                                                           | 4/8 high school or less<br>4/8 some college or technical school                               | NS                   | NS                                | 4/8 $\geq 1$ mental illnesses; including bipolar disorder, depression, obsessive-compulsive disorder, and borderline personality disorder | 8              | 0  |       |
| Grimes & Smirnova, 2020                 | Adult men who had completed the "earn-a-bike" programme and had experienced homelessness at the time of participating in the programme.                                                     | 16                     | Range: 30-65<br>Mean: 46.0<br>SD: NS                                                                    | 1/16 less than high school<br>9/16 high school<br>4/16 some college<br>2/16 completed college | 2/8 <sup>b</sup>     | 4/8 African American<br>4/8 White | NS                                                                                                                                        | 0              | 16 |       |
| Helge et al, 2014 & Randers et al, 2012 | Homeless adult men recruited from shelters and unemployment offices in Copenhagen.                                                                                                          | 28                     | Range: NS<br>Football group:<br>Mean (SD):<br>36.4 (10.0)<br>Control group:<br>Mean (SD):<br>42.7 (8.5) | NS                                                                                            | NS                   | NS                                | NS                                                                                                                                        | 0              | 28 |       |
| Kendzor et al, 2017                     | Adults living in transitional shelters, a score of $\geq 4$ on Rapid Estimate of Adult Literacy in Medicine- Short Form, physically ambulatory and resident at shelter for $\leq 3$ months. | 32                     | Range: NS<br>Mean (SD): 48.38 (8.12)                                                                    | 12.63 (2.08) <sup>a</sup>                                                                     | NS                   | 27/32 African American            | NS                                                                                                                                        | 8              | 24 |       |

|                      |                                                                                                                                                                                                                                                                                                                                                      |                                                  |                                        |    |         |                                                                                                                                                                 |                                            |    |    |                |
|----------------------|------------------------------------------------------------------------------------------------------------------------------------------------------------------------------------------------------------------------------------------------------------------------------------------------------------------------------------------------------|--------------------------------------------------|----------------------------------------|----|---------|-----------------------------------------------------------------------------------------------------------------------------------------------------------------|--------------------------------------------|----|----|----------------|
| Knestaut et al, 2010 | Adult men and women living in a homeless shelter                                                                                                                                                                                                                                                                                                     | 11                                               | Range: 18-50                           | NS | NS      | Caucasian (n = 9), Latina (n = 1) African American (n = 1)                                                                                                      | NS                                         | 8  | 3  |                |
| Magee & Jeanes, 2013 | Men who played in United Kingdom Homeless Word Cup squad. All of whom lived in either social services accommodation or hostels and had spent time living rough.                                                                                                                                                                                      | 6                                                | Range: 16-29<br>Mean (SD): NS          | NS | 0/6     | NS                                                                                                                                                              | NS                                         | 0  | 6  |                |
| Malden et al, 2019   | Adults experiencing homelessness (living in hostel accommodation or on the streets) and had attended ≤10 Street Fit Scotland sessions.                                                                                                                                                                                                               | 10                                               | Range: 21-36<br>Mean (SD): NS          | NS | 1/10    | NS                                                                                                                                                              | NS                                         | 5  | 5  |                |
| Norton et al, 2020   | Adult women who, at the time of study, were living in a shelter for women without housing.                                                                                                                                                                                                                                                           | 82                                               | Range: 18-63<br>Mean (SD): 35.8 (11.4) | NS | NS      | 41/83 Black<br>16/83 White<br>18/83 Hispanic<br>3/83 Other                                                                                                      | NS                                         | 82 | 0  |                |
| Parry et al, 2021a   | Young people experiencing or at risk of homelessness who attended at least one My Strength Training for life (MST4Life) and consented/ engaged with qualitative data collection; housing service staff with one-to-one experience with MST4Life participants; and, Outdoor Adventure Education (OAE) staff supporting phase 2 of MST4Life programme. | 30 PEH<br>6 housing service staff<br>5 OAE staff | Range: 16-24<br>Mean (SD): 20 (2.04)   | NS | 10/30   | 18/30 <sup>c</sup> White<br>8/30 <sup>c</sup> Mixed ethnicities<br>2/30 <sup>c</sup> Black<br>2/30 <sup>c</sup> Asian<br>1/30 <sup>c</sup> other                | 23/30 <sup>c</sup> mental health condition | 15 | 14 | 1 <sup>d</sup> |
| Parry et al, 2021b   | Young people experiencing or at risk of homelessness who had participated in phase 1 of My Strength Training for life (MST4Life).                                                                                                                                                                                                                    | 54                                               | Range: 16-24<br>Mean, SD: 19.43 (2.18) | NS | 3/54*** | 33/54 <sup>c</sup> White<br>11/54 <sup>c</sup> multiple or mixed ethnic groups<br>2/54 <sup>c</sup> Asian<br>2/54 <sup>c</sup> Black<br>2/54 <sup>c</sup> Other | NS                                         | 22 | 31 | 1 <sup>d</sup> |

|                           |                                                                                                                                                                                   |                                                   |                                                                         |    |    |                                                                         |                                                                       |                 |                  |  |
|---------------------------|-----------------------------------------------------------------------------------------------------------------------------------------------------------------------------------|---------------------------------------------------|-------------------------------------------------------------------------|----|----|-------------------------------------------------------------------------|-----------------------------------------------------------------------|-----------------|------------------|--|
| Randers et al 2010        | Homeless men                                                                                                                                                                      | 15                                                | Range: 19-44<br>Mean, SD:<br>29 (2)                                     | NS | NS | NS                                                                      | NS                                                                    | 0               | 15               |  |
| Randers et al, 2018       | Adult women participating in the Women's Homeless World Cup.                                                                                                                      | 15                                                | Range: NS<br>Mean, SD: 30.3 ± 5.0                                       | NS | NS | NS                                                                      | NS                                                                    | 15              | 0                |  |
| Shors et al, 2014         | Adult women (mothers) who were recently homeless and >1 month poverty, trauma and addictive behaviour                                                                             | 15                                                | Range: 18-36<br>Mean (SD):<br>25.0 (5.0)                                | NS | NS | NS                                                                      | NS                                                                    | 15              | 0                |  |
| Sherry, 2010              | Men, >16 years old, who played in Australian 2006 Homeless World Cup team, had experienced homelessness in previous 2 years and/or in a drug or alcohol rehabilitation programme. | 8                                                 | NS                                                                      | NS | NS | NS                                                                      | NS                                                                    | 0               | 8                |  |
| Sherry & Strybosch, 2012  | Soccer program participants of the Community Street Soccer Programme; coaches and support workers of the programme.                                                               | 165 players<br>11 Coaches<br>10 (support workers) | Range: 'under 18'-40<br>Most concentrated cohort 20-24<br>Mean (SD): NS | NS | NS | NS                                                                      | 66/165 <sup>c</sup> suffering from depression or other mental illness | 23 <sup>c</sup> | 142 <sup>c</sup> |  |
| Welty Peachey et al, 2013 | Participants were players, coaches and administrators from Street Soccer USA Cup (SSUSA) who represented the geographic areas served by SSUSA                                     | 11 players<br>6 staff                             | Range: 17-54<br>Mean (SD): NS                                           | NS | NS | 4/11 White<br>4/11 African-American<br>2/11 Hispanic<br>1/11 Mixed race | NS                                                                    | 3               | 8                |  |

NS: not stated, SD: standard deviation, <sup>a</sup> mean(sd) years of education, <sup>b</sup> number in employment/education/training, <sup>c</sup> percentage supplied without accompanying numbers, closest whole number deduced relative to number of participants is reported, <sup>d</sup> identified as transgender
